# Supplementary material for: Isolated alkali cation complexes of the antibiotic ionophore nonactin: correlation with crystalline structures
Source: Royal Society of Chemistry journal article supplement (doi:10.1039/c7cp02438j), 2017-01-01
Supplement: c7cp02438j2.pdf [file c7cp02438j2.pdf]

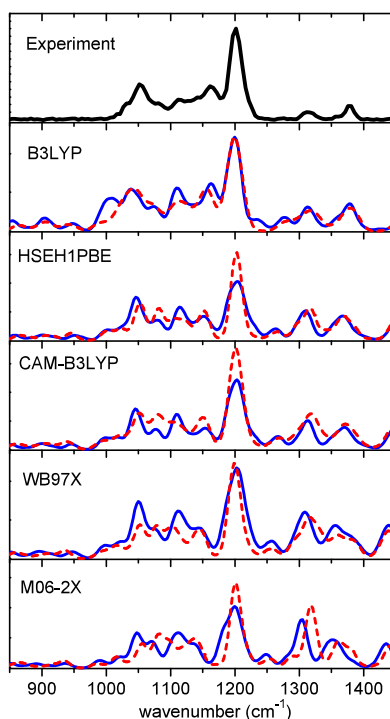

**Supplementary Information. Fig. S1:** Experimental IRMPD spectrum recorded for the nonactin- $\text{Na}^+$  complex compared to the IR spectra predicted for the  $1\text{C}_2$  (blue, solid line) and  $2\text{S}_4$  (red, dashed line) conformers, by computations with different density functionals (as indicated in each panel). The 6-311+G(d) basis set is employed in all cases. It can be noted that the B3LYP functional provides the best agreement with the shape of the IRMPD bands, in particular in the  $950\text{--}1250\text{ cm}^{-1}$  range.
