# Supplementary figures and images for: Isolated alkali cation complexes of the antibiotic ionophore nonactin: correlation with crystalline structures
Source: Royal Society of Chemistry journal article supplement (doi:10.1039/c7cp02438j), 2017-01-01

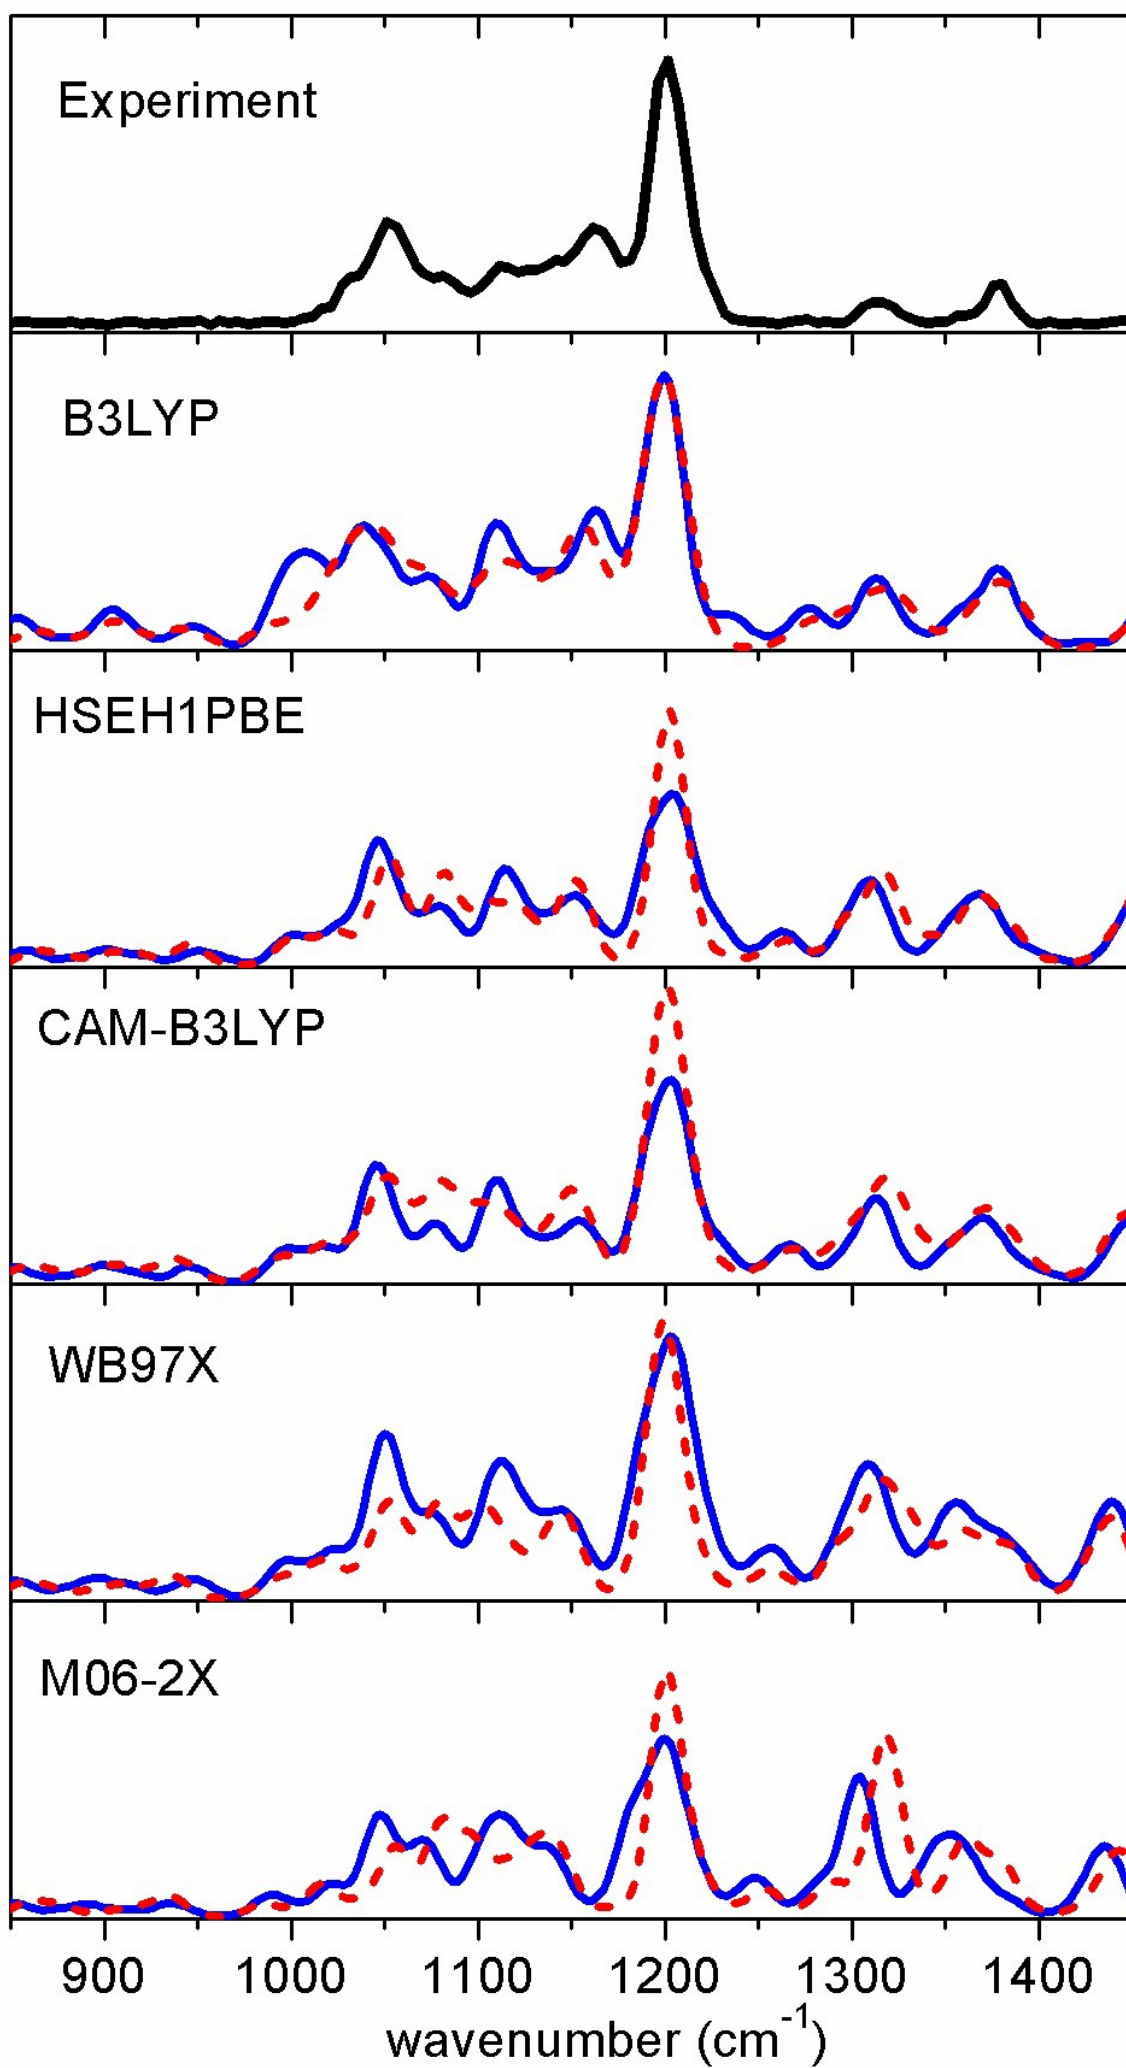

Supplement: c7cp02438j1.pdf [file c7cp02438j1.pdf]
